# Supplementary material for: Diagnosis of cardiac surgery-associated acute kidney injury: differential roles of creatinine, chitinase 3-like protein 1 and neutrophil gelatinase-associated lipocalin: a prospective cohort study
Source: Springer Nature journal article supplement (doi:10.1186/s13613-017-0251-z), 2017-03-01

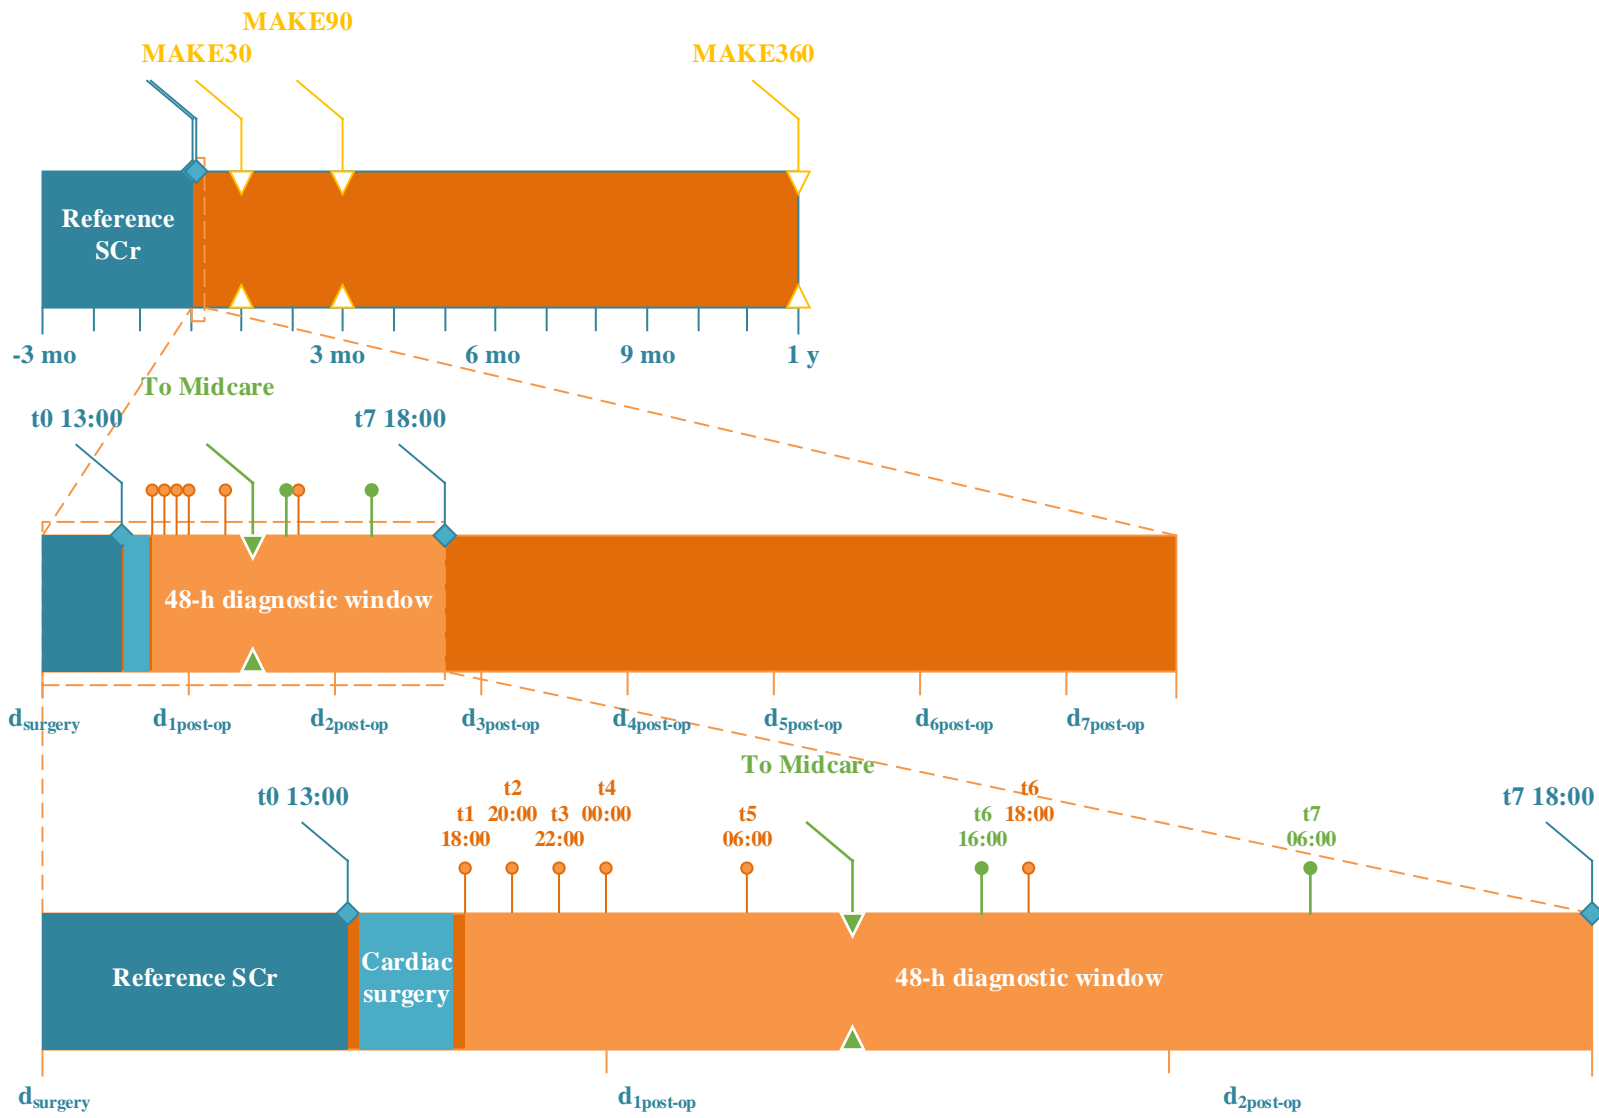

Supplement: MOESM4 [file 12105096]
