# Supplementary material for: Diagnosis of cardiac surgery-associated acute kidney injury: differential roles of creatinine, chitinase 3-like protein 1 and neutrophil gelatinase-associated lipocalin: a prospective cohort study
Source: Springer Nature journal article supplement (doi:10.1186/s13613-017-0251-z), 2017-03-01
Supplement: MOESM6 [file 12105096]

Analysed  
N = 203

12-h window

24-h window

48-h window

SCr

UO

SCr /  
UO

SCr

UO

SCr /  
UO

SCr

UO

SCr /  
UO

No AKI  
N = 161  
79.3 %

No AKI  
N = 198  
97.5 %

No AKI  
N = 157  
77.3 %

No AKI  
N = 131  
64.5 %

No AKI  
N = 173  
85.2 %

No AKI  
N = 118  
58.1 %

No AKI  
N = 119  
58.6 %

No AKI  
N = 155  
76.4 %

No AKI  
N = 108  
53.2 %

AKI stage 1  
N = 39  
19.2 %

AKI stage 1  
N = 5  
2.5 %

AKI stage 1  
N = 43  
21.2 %

AKI stage 1  
N = 64  
31.5 %

AKI stage 1  
N = 25  
12.3 %

AKI stage 1  
N = 72  
35.5 %

AKI stage 1  
N = 61  
30.0 %

AKI stage 1  
N = 34  
16.7 %

AKI stage 1  
N = 67  
33.0 %

AKI stage 2  
N = 3  
1.5 %

AKI stage 2  
N = 0  
0.0 %

AKI stage 2  
N = 3  
1.5 %

AKI stage 2  
N = 7  
3.4 %

AKI stage 2  
N = 5  
2.5 %

AKI stage 2  
N = 12  
5.9 %

AKI stage 2  
N = 14  
6.9 %

AKI stage 2  
N = 13  
6.4 %

AKI stage 2  
N = 19  
9.4 %

AKI stage 3  
N = 0  
0.0 %

AKI stage 3  
N = 0  
0.0 %

AKI stage 3  
N = 0  
0.0 %

AKI stage 3  
N = 1  
0.5 %

AKI stage 3  
N = 0  
0.0 %

AKI stage 3  
N = 1  
0.5 %

AKI stage 3  
N = 9  
4.4 %

AKI stage 3  
N = 1  
0.5 %

AKI stage 3  
N = 9  
4.4 %

SCr+  
UO-

SCr-  
UO+

SCr+  
UO+

SCr+  
UO-

SCr-  
UO+

SCr+  
UO+

SCr+  
UO-

SCr-  
UO+

SCr+  
UO+

Stage 1 N = 38  
Stage 2 N = 3  
Stage 3 N = 0

N = 4  
N = 0  
N = 0

N = 1  
N = 0  
N = 0

N = 47  
N = 7  
N = 1

N = 8  
N = 5  
N = 0

N = 17  
N = 0  
N = 0

N = 33  
N = 6  
N = 8

N = 6  
N = 5  
N = 0

N = 28  
N = 8  
N = 1
