# Supplementary material for: Diagnosis of cardiac surgery-associated acute kidney injury: differential roles of creatinine, chitinase 3-like protein 1 and neutrophil gelatinase-associated lipocalin: a prospective cohort study
Source: Ann Intensive Care. 2017 Mar 1;7:24. doi: 10.1186/s13613-017-0251-z (PMC5332341; doi:10.1186/s13613-017-0251-z)
Supplement: Supplementary file 1 — Additional file 1: Figure S1. STROBE statement—checklist of items that should be included in the reports of cohort studies (1). [file 13613_2017_251_MOESM1_ESM.pdf]

|                            | Item No.        | STROBE recommendation                                                                                                                                                                                                                                                                                                                                                                                           | Fulfilled                      |
|----------------------------|-----------------|-----------------------------------------------------------------------------------------------------------------------------------------------------------------------------------------------------------------------------------------------------------------------------------------------------------------------------------------------------------------------------------------------------------------|--------------------------------|
| <b>Title and abstract</b>  | 1               | (a) Indicate the study's design with a commonly used term in the title or the abstract<br>(b) Provide in the abstract an informative and balanced summary of what was done and what was found                                                                                                                                                                                                                   | Yes<br>Yes                     |
| <b>Introduction</b>        |                 |                                                                                                                                                                                                                                                                                                                                                                                                                 |                                |
| Background / rationale     | 2               | Explain the scientific background and rationale for the investigation being reported                                                                                                                                                                                                                                                                                                                            | Yes                            |
| Objectives                 | 3               | State specific objectives, including any pre-specified hypotheses                                                                                                                                                                                                                                                                                                                                               | Yes                            |
| <b>Methods</b>             |                 |                                                                                                                                                                                                                                                                                                                                                                                                                 |                                |
| Study design               | 4               | Present key elements of study design early in the paper                                                                                                                                                                                                                                                                                                                                                         | Yes                            |
| Setting                    | 5               | Describe the setting, locations, and relevant dates, including periods of recruitment, exposure, follow-up, and data collection                                                                                                                                                                                                                                                                                 | Yes                            |
| Participants               | 6               | (a) Give the eligibility criteria, and the sources and methods of selection of participants. Describe methods of follow-up<br>(b) For matched studies, give matching criteria and number of exposed and unexposed                                                                                                                                                                                               | Yes<br>NA                      |
| Variables                  | 7               | Clearly define all outcomes, exposures, predictors, potential confounders, and effect modifiers. Give diagnostic criteria, if applicable                                                                                                                                                                                                                                                                        | Yes                            |
| Data sources / measurement | 8 <sup>a</sup>  | For each variable of interest, give sources of data and details of methods of assessment (measurement). Describe comparability of assessment methods if there is more than one group                                                                                                                                                                                                                            | Yes                            |
| Bias                       | 9               | Describe any efforts to address potential sources of bias                                                                                                                                                                                                                                                                                                                                                       | Yes                            |
| Study size                 | 10              | Explain how the study size was arrived at                                                                                                                                                                                                                                                                                                                                                                       | Yes                            |
| Quantitative variables     | 11              | Explain how quantitative variables were handled in the analyses. If applicable, describe which groupings were chosen and why                                                                                                                                                                                                                                                                                    | Yes                            |
| Statistical methods        | 12              | (a) Describe all statistical methods, including those used to control for confounding<br>(b) Describe any methods used to examine subgroups and interactions<br>(c) Explain how missing data were addressed<br>(d) If applicable, explain how loss to follow-up was addressed<br>(e) Describe any sensitivity analyses                                                                                          | Yes<br>Yes<br>Yes<br>Yes<br>NA |
| <b>Results</b>             |                 |                                                                                                                                                                                                                                                                                                                                                                                                                 |                                |
| Participants               | 13 <sup>a</sup> | (a) Report numbers of individuals at each stage of study - e.g., numbers potentially eligible, examined for eligibility, confirmed eligible, included in the study, completing follow-up, and analysed<br>(b) Give reasons for non-participation at each stage<br>(c) Consider use of a flow diagram                                                                                                            | Yes<br>Yes<br>Yes              |
| Descriptive data           | 14 <sup>a</sup> | (a) Give characteristics of study participants (e.g., demographic, clinical, social) and information on exposures and potential confounders<br>(b) Indicate number of participants with missing data for each variable of interest<br>(c) Summarize follow-up time (e.g., average and total amount)                                                                                                             | Yes<br>Yes<br>Yes              |
| Outcome data               | 15 <sup>a</sup> | Report numbers of outcome events or summary measures over time                                                                                                                                                                                                                                                                                                                                                  | Yes                            |
| Main results               | 16              | (a) Give unadjusted estimates and, if applicable, confounder-adjusted estimates and their precision (e.g., 95% confidence interval). Make clear which confounders were adjusted for and why they were included<br>(b) Report category boundaries when continuous variables were categorized<br>(c) If relevant, consider translating estimates of relative risk into absolute risk for a meaningful time period | Yes<br>NA<br>NA                |
| Other analyses             | 17              | Report other analyses done - e.g., analyses of subgroups and interactions, and sensitivity analyses                                                                                                                                                                                                                                                                                                             | Yes                            |
| <b>Discussion</b>          |                 |                                                                                                                                                                                                                                                                                                                                                                                                                 |                                |
| Key results                | 18              | Summarize key results with reference to study objectives                                                                                                                                                                                                                                                                                                                                                        | Yes                            |
| Limitations                | 19              | Discuss limitations of the study, taking into account sources of potential bias or imprecision. Discuss both direction and magnitude of any potential bias                                                                                                                                                                                                                                                      | Yes                            |
| Interpretation             | 20              | Give a cautious overall interpretation of results considering objectives, limitations, multiplicity of analyses, results from similar studies, and other relevant evidence                                                                                                                                                                                                                                      | Yes                            |
| Generalizability           | 21              | Discuss the generalizability (external validity) of the study results                                                                                                                                                                                                                                                                                                                                           | Yes                            |
| <b>Other information</b>   |                 |                                                                                                                                                                                                                                                                                                                                                                                                                 |                                |
| Funding                    | 22              | Give the source of funding and the role of the funders for the present study and, if applicable, for the original study on which the present article is based                                                                                                                                                                                                                                                   | Yes                            |

<sup>a</sup>Give information separately for exposed and unexposed groups
