# Supplementary material for: Diagnosis of cardiac surgery-associated acute kidney injury: differential roles of creatinine, chitinase 3-like protein 1 and neutrophil gelatinase-associated lipocalin: a prospective cohort study
Source: Ann Intensive Care. 2017 Mar 1;7:24. doi: 10.1186/s13613-017-0251-z (PMC5332341; doi:10.1186/s13613-017-0251-z)
Supplement: Supplementary file 5 — Additional file 5. Table S1: Data collected in the clinical research file. Table S2: Dilution of serum and urine samples for the initial measurement of CHI3L1 by ELISA. Table S3: Characteristics of the patients and procedures peri-operatively. Table S4A: Biomarker performances at t0 for prediction of AKI. Table S4B: Biomarker performances at t1 for prediction of AKI. Table S4C: Biomarker performances at t2 for prediction of AKI. Table S4D: Biomarker performances at t3 for prediction of AKI. [file 13613_2017_251_MOESM5_ESM.pdf]

## SUPPLEMENTAL TABLES

**Table S1 Data collected in the clinical research file**

|                                                                 |  |                                                                                                                          |
|-----------------------------------------------------------------|--|--------------------------------------------------------------------------------------------------------------------------|
| I. Patient information                                          |  |                                                                                                                          |
| A. Study identification                                         |  | A / □□□                                                                                                                  |
| B. Date of birth                                                |  | □□ / □□ / □□□□                                                                                                           |
| C. Sex                                                          |  | <input type="checkbox"/> Male or <input type="checkbox"/> Female                                                         |
| D. Race                                                         |  | <input type="checkbox"/> Caucasian or <input type="checkbox"/> Black                                                     |
| E. Smoking status                                               |  | <input type="checkbox"/> Current smoker or <input type="checkbox"/> Ex-smoker or <input type="checkbox"/> Non-smoker     |
| ♦ Smoking history: cumulative number of pack-years <sup>a</sup> |  | — Textbox                                                                                                                |
| F. Alcohol use                                                  |  | <input type="checkbox"/> Yes or <input type="checkbox"/> No                                                              |
| ♦ Quantity of alcohol intake                                    |  | — Textbox                                                                                                                |
| G. Weight (kg)                                                  |  | — Textbox                                                                                                                |
| H. Length (cm)                                                  |  | — Textbox                                                                                                                |
| I. BMI                                                          |  | — Textbox                                                                                                                |
| II. Medical data                                                |  |                                                                                                                          |
| A. Medical history                                              |  |                                                                                                                          |
| 1. NYHA class                                                   |  | <input type="checkbox"/> I or <input type="checkbox"/> II or <input type="checkbox"/> III or <input type="checkbox"/> IV |
| 2. DM                                                           |  | <input type="checkbox"/> Type 1 or <input type="checkbox"/> Type 2 or <input type="checkbox"/> No DM                     |
| ♦ Therapy for DM                                                |  | <input type="checkbox"/> Insulin therapy or <input type="checkbox"/> Therapy per os                                      |
| 3. Other comorbidities                                          |  | — Textbox                                                                                                                |
| 4. Pre-operative medication list                                |  | — Textbox                                                                                                                |
| B. Admission diagnosis                                          |  |                                                                                                                          |
| 1. Date of hospital admission                                   |  | □□ / □□ / □□□□                                                                                                           |
| ♦ Diagnosis at hospital admission                               |  | — Textbox                                                                                                                |
| 2. Date of ICU admission                                        |  | □□ / □□ / □□□□                                                                                                           |
| ♦ Diagnosis at ICU admission                                    |  | — Textbox                                                                                                                |
| C. Baseline registrations                                       |  |                                                                                                                          |

## ADDITIONAL FILE 5

|                                            |                                                                                              |
|--------------------------------------------|----------------------------------------------------------------------------------------------|
| 1. Blood pressure (mm Hg; highest)         |                                                                                              |
| i. Systolic / Diastolic                    | — Textbox                                                                                    |
| ii. Mean                                   | — Textbox                                                                                    |
| 2. Heart rhythm                            | <input type="checkbox"/> Atrial fibrillation or <input type="checkbox"/> Normal sinus rhythm |
| 3. Heart rate in normal sinus rhythm (bpm) | — Textbox                                                                                    |
| 4. Ejection fraction (%)                   |                                                                                              |
| i. Pre-operative                           | — Textbox                                                                                    |
| ii. Post-operative                         | — Textbox                                                                                    |
| 5. Fractional shortening (%)               |                                                                                              |
| i. Pre-operative                           | — Textbox                                                                                    |
| ii. Post-operative                         | — Textbox                                                                                    |
| 6. Reference SCr                           | — Textbox                                                                                    |
| 7. Reference eGFR <sub>CKD-EPI</sub>       | — Textbox                                                                                    |
| 8. Medication                              |                                                                                              |
| i. Statins                                 | <input type="checkbox"/> Yes or <input type="checkbox"/> No                                  |
| ii. ACE inhibitors                         | <input type="checkbox"/> Yes or <input type="checkbox"/> No                                  |
| iii. ARBs                                  | <input type="checkbox"/> Yes or <input type="checkbox"/> No                                  |
| iv. Diuretics                              | <input type="checkbox"/> Yes or <input type="checkbox"/> No                                  |
| v. NSAIDs                                  | <input type="checkbox"/> Yes or <input type="checkbox"/> No                                  |
| vi. Corticosteroids                        | <input type="checkbox"/> Yes or <input type="checkbox"/> No                                  |
| vii. Tacrolimus                            | <input type="checkbox"/> Yes or <input type="checkbox"/> No                                  |
| viii. Cyclosporine                         | <input type="checkbox"/> Yes or <input type="checkbox"/> No                                  |
| ix. Aminoglycosides                        | <input type="checkbox"/> Yes or <input type="checkbox"/> No                                  |
| x. Iodinated contrast pre-operatively      | <input type="checkbox"/> Yes or <input type="checkbox"/> No                                  |
| ♦ Date                                     | □□ / □□ / □□□□                                                                               |
| xi. Corticosteroids intra-operatively      | <input type="checkbox"/> Yes or <input type="checkbox"/> No                                  |
| D. Index surgical procedure                |                                                                                              |
| 1. Euroscore                               | — Textbox                                                                                    |
| 2. Type of cardiac surgical procedure      | — Textbox                                                                                    |

## ADDITIONAL FILE 5

|       |                                                                                                               |                                                                    |
|-------|---------------------------------------------------------------------------------------------------------------|--------------------------------------------------------------------|
| 3.    | Duration of surgery (h)                                                                                       | — Textbox                                                          |
| 4.    | IABP peri-operatively                                                                                         | <input type="checkbox"/> Yes or <input type="checkbox"/> No        |
| 5.    | ECC data                                                                                                      |                                                                    |
| i.    | Mean blood pressure on pump                                                                                   | — Textbox                                                          |
| ii.   | Diuretics on pump                                                                                             | <input type="checkbox"/> Yes or <input type="checkbox"/> No        |
| iii.  | Diuresis on pump (ml)                                                                                         | — Textbox                                                          |
| iv.   | Priming volume of pump (ml)                                                                                   | — Textbox                                                          |
| v.    | Haematocrit (%)                                                                                               |                                                                    |
| ♦     | Before pump                                                                                                   | — Textbox                                                          |
| ♦     | After pump                                                                                                    | — Textbox                                                          |
| vi.   | SCr (mg/dl)                                                                                                   |                                                                    |
| ♦     | Before pump                                                                                                   | — Textbox                                                          |
| ♦     | After pump                                                                                                    | — Textbox                                                          |
| vii.  | Duration of ECC (min)                                                                                         | — Textbox                                                          |
| viii. | Duration of aortic clamp (min)                                                                                | — Textbox                                                          |
| ix.   | Duration of ischemia (min)                                                                                    | — Textbox                                                          |
| E.    | Study follow-up (to be filled in for $d_{\text{surgery}}$ , $d_{1\text{post-op}}$ and $d_{2\text{post-op}}$ ) |                                                                    |
| 1.    | RRT                                                                                                           | <input type="checkbox"/> Yes or <input type="checkbox"/> No        |
| ♦     | Date                                                                                                          | <input type="text"/> / <input type="text"/> / <input type="text"/> |
| 2.    | SOFA score                                                                                                    | — Textbox                                                          |
| 3.    | WBC count ( $10^3/\mu\text{l}$ )                                                                              | — Textbox                                                          |
| 4.    | Serum CRP (mg/l)                                                                                              | — Textbox                                                          |
| 5.    | Fluid balance                                                                                                 | — Textbox                                                          |
| ♦     | Total fluid IN (ml)                                                                                           | — Textbox                                                          |
| ♦     | Total fluid OUT (ml)                                                                                          | — Textbox                                                          |
| 6.    | Transfusions                                                                                                  |                                                                    |
| i.    | Whole blood                                                                                                   | <input type="checkbox"/> Yes or <input type="checkbox"/> No        |
| ♦     | Number of units transfused                                                                                    | — Textbox                                                          |

## ADDITIONAL FILE 5

|               |                                     |                                                             |
|---------------|-------------------------------------|-------------------------------------------------------------|
| ii.           | Plasma                              | <input type="checkbox"/> Yes or <input type="checkbox"/> No |
| ◆             | Number of units transfused          | — Textbox                                                   |
| iii.          | Platelets                           | <input type="checkbox"/> Yes or <input type="checkbox"/> No |
| ◆             | Number of units transfused          | — Textbox                                                   |
| 7. Medication |                                     |                                                             |
| i.            | Milrinone (PDE3 inhibitor)          | <input type="checkbox"/> Yes or <input type="checkbox"/> No |
| ii.           | Vasopressor(s)                      | <input type="checkbox"/> Yes or <input type="checkbox"/> No |
| ◆             | Generic name(s)                     | — Textbox                                                   |
| iii.          | Antibiotic(s)                       | <input type="checkbox"/> Yes or <input type="checkbox"/> No |
| ◆             | Generic name(s)                     | — Textbox                                                   |
| iv.           | Statins                             | <input type="checkbox"/> Yes or <input type="checkbox"/> No |
| v.            | ACE inhibitors                      | <input type="checkbox"/> Yes or <input type="checkbox"/> No |
| vi.           | ARBs                                | <input type="checkbox"/> Yes or <input type="checkbox"/> No |
| vii.          | Diuretics                           | <input type="checkbox"/> Yes or <input type="checkbox"/> No |
| viii.         | Tacrolimus                          | <input type="checkbox"/> Yes or <input type="checkbox"/> No |
| ix.           | Cyclosporine                        | <input type="checkbox"/> Yes or <input type="checkbox"/> No |
| x.            | Iodinated contrast post-operatively | <input type="checkbox"/> Yes or <input type="checkbox"/> No |

<sup>a</sup>A pack-year is defined as twenty cigarettes smoked every day for one year

*ACE* angiotensin-converting enzyme, *ARB* angiotensin-II receptor blocker, *BMI* body mass index, *bpm* beats per minute, *CKD-EPI* Chronic Kidney Disease Epidemiology Collaboration, *CRP* C-reactive protein, *d* day, *DM* diabetes mellitus, *ECC* extracorporeal circulation, *eGFR* estimated glomerular filtration rate, *EuroSCORE* European System for Cardiac Operative Risk Evaluation, *h* hour, *IABP* intra-aortic balloon pump, *ICU* intensive care unit, *min* minute, *NSAID* non-steroidal anti-inflammatory drug, *NYHA* New York Heart Association, *PDE3* phosphodiesterase 3, *post-op* post-operatively, *RRT* renal replacement therapy, *SCr* serum creatinine, *SOFA* Sepsis-related Organ Failure Assessment, *WBC* white blood cell

**Table S2 Dilution of serum and urine samples for the initial measurement of CHI3L1 by ELISA**

| Time point of the study                                                                  | Estimated dilution for serum sample | Estimated dilution for urine sample |
|------------------------------------------------------------------------------------------|-------------------------------------|-------------------------------------|
| t0                                                                                       | 1/100                               | 1/2                                 |
| t1                                                                                       | 1/100                               | 1/2                                 |
| t2                                                                                       | 1/200                               | 1/4                                 |
| t3                                                                                       | 1/200                               | 1/4                                 |
| t4                                                                                       | 1/200                               | 1/4                                 |
| t5                                                                                       | 1/500                               | 1/4                                 |
| t6                                                                                       | 1/500                               | 1/4                                 |
| t7                                                                                       | 1/500                               | 1/4                                 |
| <i>CHI3L1</i> chitinase 3-like protein 1, <i>ELISA</i> enzyme-linked immunosorbent assay |                                     |                                     |



## ADDITIONAL FILE 5

|                                       |                          |                          |                         |       |                        |                       |                       |       |                       |                       |                      |       |
|---------------------------------------|--------------------------|--------------------------|-------------------------|-------|------------------------|-----------------------|-----------------------|-------|-----------------------|-----------------------|----------------------|-------|
| Transfusion(s) – no.<br>(%) [95 % CI] |                          |                          |                         |       |                        |                       |                       |       |                       |                       |                      |       |
| Whole blood                           | 37 (18.2)<br>[13.5-24.1] | 22 (23.2)<br>[15.8-32.6] | 15 (13.9)<br>[8.6-21.7] | 0.102 | 13 (6.4)<br>[3.8-10.6] | 8 (8.4)<br>[4.3-15.7] | 5 (4.6)<br>[2.0-10.4] | 0.390 | 11 (5.4)<br>[3.1-9.4] | 7 (7.4)<br>[3.6-14.4] | 4 (3.7)<br>[1.4-9.1] | 0.354 |
| Plasma                                | 14 (6.9)<br>[4.2-11.2]   | 6 (6.3)<br>[2.9-13.1]    | 8 (7.4)<br>[3.8-13.9]   | 0.789 | 3 (1.5)<br>[0.5-4.3]   | 2 (2.1)<br>[0.6-7.4]  | 1 (0.9)<br>[0.2-5.1]  | 0.600 | 3 (1.5)<br>[0.5-4.3]  | 3 (3.2)<br>[1.1-8.9]  | 0 (0.0)<br>[0.0-3.4] | 0.101 |
| Platelets                             | 11 (5.4)<br>[3.1-9.4]    | 8 (8.4)<br>[4.3-15.7]    | 3 (2.8)<br>[0.9-7.9]    | 0.118 | 1 (0.5)<br>[0.1-2.7]   | 1 (1.1)<br>[0.2-5.7]  | 0 (0.0)<br>[0.0-3.4]  | 0.468 | 1 (0.5)<br>[0.1-2.7]  | 1 (1.1)<br>[0.2-5.7]  | 0 (0.0)<br>[0.0-3.4] | 0.468 |
| No. of units<br>transfused (IQR)      |                          |                          |                         |       |                        |                       |                       |       |                       |                       |                      |       |
| Whole blood                           | 2.0 (1.0-<br>3.0)        | 2.0 (1.0-<br>3.5)        | 2.0 (1.0-<br>2.0)       | 0.531 | 1.0 (1.0-<br>2.0)      | 1.0 (1.0-<br>2.0)     | 1.0 (1.0-<br>2.0)     | 1.000 | 1.0 (1.0-<br>2.0)     | 1.0 (1.0-<br>3.0)     | 1.0 (1.0-<br>1.0)    | 0.315 |
| Plasma                                | 3.0 (2.0-<br>4.3)        | 4.5 (3.8-<br>5.3)        | 2.0 (2.0-<br>2.8)       | 0.001 | 1.0 (1.0-)             | 1.5 (1.0-)            | 1.0 (1.0-<br>1.0)     | 1.000 | 3.0 (1.0-)            | 3.0 (1.0-)            | NA                   | NA    |
| Platelets                             | 9.0 (6.0-<br>10.0)       | 8.5 (6.5-<br>10.0)       | 10.0 (1.0-)             | 0.921 | 1.0 (1.0-<br>1.0)      | 1.0 (1.0-<br>1.0)     | NA                    | NA    | 10.0 (10.0-<br>10.0)  | 10.0 (10.0-<br>10.0)  | NA                   | NA    |
| Medication – no.<br>(%) [95 % CI]     |                          |                          |                         |       |                        |                       |                       |       |                       |                       |                      |       |
| Vasopressors                          | 98 (48.3)                | 49 (51.6)                | 49 (45.4)               | 0.401 | 92 (45.3)              | 48 (50.5)             | 44 (40.7)             | 0.203 | 29 (14.3)             | 20 (21.1)             | 9 (8.3)              | 0.015 |

## ADDITIONAL FILE 5

|                                   |                        |                         |                       |       |                           |                          |                          |         |                           |                          |                          |       |
|-----------------------------------|------------------------|-------------------------|-----------------------|-------|---------------------------|--------------------------|--------------------------|---------|---------------------------|--------------------------|--------------------------|-------|
|                                   | [41.5-55.1]            | [41.7-61.4]             | [36.3-54.8]           |       | [38.6-52.2]               | [40.6-60.4]              | [31.9-50.2]              |         | [10.1-19.8]               | [14.1-30.3]              | [4.4-15.1]               |       |
| Milrinone (PDE3 inhibitor)        | 19 (9.4)<br>[6.1-14.2] | 14 (14.7)<br>[9.0-23.2] | 5 (4.6)<br>[2.0-10.4] | 0.016 | 21 (10.3)<br>[6.9-15.3]   | 15 (15.8)<br>[9.8-24.4]  | 6 (5.6)<br>[2.6-11.6]    | 0.021   | 14 (6.9)<br>[4.2-11.2]    | 10 (10.5)<br>[5.8-18.3]  | 4 (3.7)<br>[1.4-9.1]     | 0.093 |
| Statins                           | 4 (2.0)<br>[0.8-5.0]   | 1 (1.1)<br>[0.2-5.7]    | 3 (2.8)<br>[0.9-7.9]  | 0.624 | 93 (45.8)<br>[39.1-52.7]  | 44 (46.3)<br>[36.6-56.3] | 49 (45.4)<br>[36.3-54.8] | 1.000   | 107 (52.7)<br>[45.9-59.5] | 46 (48.4)<br>[38.6-58.3] | 61 (56.5)<br>[47.1-65.5] | 0.263 |
| ACE inhibitors                    | 1 (0.5)<br>[0.1-2.7]   | 0 (0.0)<br>[0.0-3.9]    | 1 (0.9)<br>[0.2-5.1]  | 1.000 | 20 (9.9)<br>[6.5-14.7]    | 8 (8.4)<br>[4.3-15.7]    | 12 (11.1)<br>[6.5-18.4]  | 0.639   | 29 (14.3)<br>[10.1-19.8]  | 12 (12.6)<br>[7.4-20.8]  | 17 (15.7)<br>[10.1-23.8] | 0.554 |
| ARBs                              | 0 (0.0)<br>[0.0-1.9]   | 0 (0.0)<br>[0.0-3.9]    | 0 (0.0)<br>[0.0-3.4]  | NA    | 3 (1.5)<br>[0.5-4.3]      | 1 (1.1)<br>[0.2-5.7]     | 2 (1.9)<br>[0.5-6.5]     | 1.000   | 3 (1.5)<br>[0.5-4.3]      | 1 (1.1)<br>[0.2-5.7]     | 2 (1.9)<br>[0.5-6.5]     | 1.000 |
| Diuretics                         | 12 (5.9)<br>[3.4-10.0] | 7 (7.4)<br>[3.6-14.4]   | 5 (4.6)<br>[2.0-10.4] | 0.553 | 120 (59.1)<br>[52.2-65.6] | 73 (76.8)<br>[67.4-84.2] | 47 (43.5)<br>[34.5-52.9] | < 0.001 | 93 (45.8)<br>[39.1-52.7]  | 55 (57.9)<br>[47.8-67.3] | 38 (35.2)<br>[26.8-44.6] | 0.002 |
| Tacrolimus                        | 0 (0.0)<br>[0.0-1.9]   | 0 (0.0)<br>[0.0-3.9]    | 0 (0.0)<br>[0.0-3.4]  | NA    | 0 (0.0)<br>[0.0-1.9]      | 0 (0.0)<br>[0.0-3.9]     | 0 (0.0)<br>[0.0-3.4]     | NA      | 0 (0.0)<br>[0.0-1.9]      | 0 (0.0)<br>[0.0-3.9]     | 0 (0.0)<br>[0.0-3.4]     | NA    |
| Cyclosporine                      | 0 (0.0)<br>[0.0-1.9]   | 0 (0.0)<br>[0.0-3.9]    | 0 (0.0)<br>[0.0-3.4]  | NA    | 2 (1.0)<br>[0.3-3.5]      | 2 (2.1)<br>[0.6-7.4]     | 0 (0.0)<br>[0.0-3.4]     | 0.218   | 2 (1.0)<br>[0.3-3.5]      | 2 (2.1)<br>[0.6-7.4]     | 0 (0.0)<br>[0.0-3.4]     | 0.218 |
| Aminoglycosides                   | 3 (1.5)<br>[0.5-4.3]   | 1 (1.1)<br>[0.2-5.7]    | 2 (1.9)<br>[0.5-6.5]  | 1.000 | 3 (1.5)<br>[0.5-4.3]      | 1 (1.1)<br>[0.2-5.7]     | 2 (1.9)<br>[0.5-6.5]     | 1.000   | 2 (1.0)<br>[0.3-3.5]      | 1 (1.1)<br>[0.2-5.7]     | 1 (0.9)<br>[0.2-5.1]     | 1.000 |
| Iodinated contrast post-operative | 0 (0.0)<br>[0.0-1.9]   | 0 (0.0)<br>[0.0-3.9]    | 0 (0.0)<br>[0.0-3.4]  | NA    | 1 (0.5)<br>[0.1-2.7]      | 1 (1.1)<br>[0.2-5.7]     | 0 (0.0)<br>[0.0-3.4]     | 0.468   | 2 (1.0)<br>[0.3-3.5]      | 1 (1.1)<br>[0.2-5.7]     | 1 (0.9)<br>[0.2-5.1]     | 1.000 |

<sup>a</sup>KDIGO definitions for the diagnosis and staging of AKI, which are based on SCr and UO

*ACE* angiotensin converting enzyme, *AKI* acute kidney injury, *ARB* angiotensin-II receptor blocker, *CI* confidence interval, *CRP* C-reactive protein, *h* hour, *IQR* interquartile range, *KDIGO* Kidney Disease: Improving Global Outcomes, *no.* number, *PDE3* phosphodiesterase 3, *SCr* serum creatinine, *SOFA* Sepsis-related Organ Failure Assessment, *UO* urine output, *WBC* white blood cell

**Table S4A Biomarker performances at t0 for prediction of AKI**

| Endpoint            | AKI stage $\geq 2^a$ within 12 h after t1 |                        |                        | AKI stage $\geq 1^a$ within 48 h after t1 |                        |                        |
|---------------------|-------------------------------------------|------------------------|------------------------|-------------------------------------------|------------------------|------------------------|
|                     | AUC-ROC                                   | Lower limit of 95 % CI | Upper limit of 95 % CI | AUC-ROC                                   | Lower limit of 95 % CI | Upper limit of 95 % CI |
| [SCH13L1]•[UCH13L1] | 0.595                                     | 0.524                  | 0.663                  | 0.599                                     | 0.526                  | 0.668                  |
| [SCr]•[SCH13L1]     | 0.580                                     | 0.510                  | 0.648                  | 0.705                                     | 0.637                  | 0.768                  |
| [SCr]•[UCH13L1]     | 0.669                                     | 0.599                  | 0.733                  | 0.582                                     | 0.510                  | 0.652                  |
| SCH13L1             | 0.508                                     | 0.438                  | 0.578                  | 0.660                                     | 0.590                  | 0.725                  |
| UCH13L1/UCr         | 0.530                                     | 0.459                  | 0.601                  | 0.518                                     | 0.445                  | 0.589                  |
| UCH13L1             | 0.578                                     | 0.507                  | 0.647                  | 0.532                                     | 0.459                  | 0.603                  |
| SCr                 | 0.696                                     | 0.629                  | 0.758                  | 0.709                                     | 0.641                  | 0.771                  |

<sup>a</sup>KDIGO definitions for the diagnosis and staging of AKI, which are based on SCr and UO

AKI acute kidney injury, AUC-ROC area under the receiver-operating characteristics curve, CI confidence interval, h hour, KDIGO Kidney Disease | Improving Global Outcomes, SCH13L1 serum chitinase 3-like protein 1, SCr serum creatinine, t0 time after the induction of anaesthesia and before the start of surgery, t1 time of intensive care unit admission, UCH13L1 urinary chitinase 3-like protein 1, UCr urinary creatinine, UO urine output

**Table S4B Biomarker performances at t1 for prediction of AKI**

| Endpoint            | AKI stage $\geq 2^a$ within 12 h after t1 |                        |                        | AKI stage $\geq 1^a$ within 48 h after t1 |                        |                        |
|---------------------|-------------------------------------------|------------------------|------------------------|-------------------------------------------|------------------------|------------------------|
|                     | AUC-ROC                                   | Lower limit of 95 % CI | Upper limit of 95 % CI | AUC-ROC                                   | Lower limit of 95 % CI | Upper limit of 95 % CI |
| $\Delta$ SCr        | 0.833                                     | 0.776                  | 0.881                  | 0.504                                     | 0.433                  | 0.575                  |
| [SCHI3L1]•[UNGAL]   | 0.659                                     | 0.590                  | 0.724                  | 0.646                                     | 0.575                  | 0.713                  |
| [SCHI3L1]•[UCHI3L1] | 0.633                                     | 0.562                  | 0.699                  | 0.621                                     | 0.549                  | 0.690                  |
| [UCHI3L1]•[UNGAL]   | 0.615                                     | 0.544                  | 0.682                  | 0.570                                     | 0.497                  | 0.640                  |
| [SCr]•[SCHI3L1]     | 0.611                                     | 0.541                  | 0.678                  | 0.725                                     | 0.658                  | 0.786                  |
| [SCr]•[UNGAL]       | 0.718                                     | 0.651                  | 0.779                  | 0.661                                     | 0.590                  | 0.726                  |
| [SCr]•[UCHI3L1]     | 0.665                                     | 0.596                  | 0.730                  | 0.598                                     | 0.526                  | 0.667                  |
| SCHI3L1             | 0.505                                     | 0.435                  | 0.575                  | 0.671                                     | 0.601                  | 0.735                  |
| UNGAL/UCr           | 0.648                                     | 0.578                  | 0.713                  | 0.599                                     | 0.528                  | 0.668                  |
| UNGAL               | 0.650                                     | 0.581                  | 0.716                  | 0.583                                     | 0.511                  | 0.653                  |
| UCHI3L1/UCr         | 0.631                                     | 0.561                  | 0.698                  | 0.557                                     | 0.484                  | 0.628                  |
| UCHI3L1             | 0.621                                     | 0.550                  | 0.688                  | 0.556                                     | 0.484                  | 0.627                  |
| SCr                 | 0.780                                     | 0.718                  | 0.834                  | 0.735                                     | 0.669                  | 0.794                  |

<sup>a</sup>KDIGO definitions for the diagnosis and staging of AKI, which are based on SCr and UO

AKI acute kidney injury, AUC-ROC area under the receiver-operating characteristics curve, CI confidence interval,  $\Delta$ SCr represents  $\Delta$ SCr<sub>t1-t0</sub>, which is the absolute change in SCr between SCr<sub>t1</sub> and SCr<sub>t0</sub>, *h* hour, KDIGO Kidney Disease | Improving Global Outcomes, SCHI3L1 serum chitinase 3-like protein 1, SCr serum creatinine, *t0* time after the induction of anaesthesia and before the start of surgery, *t1* time of intensive care unit admission, UCHI3L1 urinary chitinase 3-like protein 1, UCr urinary creatinine, UNGAL urinary neutrophil gelatinase-associated lipocalin, UO urine output

**Table S4C Biomarker performances at t2 for prediction of AKI**

| Endpoint            | AKI stage $\geq 2^a$ within 12 h after t1 |                        |                        | AKI stage $\geq 1^a$ within 48 h after t1 |                        |                        |
|---------------------|-------------------------------------------|------------------------|------------------------|-------------------------------------------|------------------------|------------------------|
|                     | AUC-ROC                                   | Lower limit of 95 % CI | Upper limit of 95 % CI | AUC-ROC                                   | Lower limit of 95 % CI | Upper limit of 95 % CI |
| $\Delta\text{SCr}$  | 0.915                                     | 0.840                  | 0.991                  | 0.556                                     | 0.471                  | 0.641                  |
| [SCH13L1]•[UCH13L1] | 0.773                                     | 0.708                  | 0.829                  | 0.643                                     | 0.571                  | 0.711                  |
| [SCr]•[SCH13L1]     | 0.725                                     | 0.658                  | 0.786                  | 0.695                                     | 0.625                  | 0.760                  |
| [SCr]•[UCH13L1]     | 0.746                                     | 0.680                  | 0.805                  | 0.651                                     | 0.579                  | 0.718                  |
| SCH13L1             | 0.628                                     | 0.557                  | 0.695                  | 0.649                                     | 0.577                  | 0.716                  |
| UCH13L1/UCr         | 0.662                                     | 0.593                  | 0.726                  | 0.574                                     | 0.502                  | 0.644                  |
| UCH13L1             | 0.686                                     | 0.617                  | 0.748                  | 0.575                                     | 0.503                  | 0.645                  |
| SCr                 | 0.821                                     | 0.760                  | 0.871                  | 0.761                                     | 0.694                  | 0.819                  |

<sup>a</sup>KDIGO definitions for the diagnosis and staging of AKI, which are based on SCr and UO

AKI acute kidney injury, AUC-ROC area under the receiver-operating characteristics curve, CI confidence interval,  $\Delta\text{SCr}$  represents  $\Delta\text{SCr}_{t2-t0}$ , which is the absolute change in SCr between  $\text{SCr}_{t2}$  and  $\text{SCr}_{t0}$ ,  $h$  hour, KDIGO Kidney Disease | Improving Global Outcomes, SCH13L1 serum chitinase 3-like protein 1, SCr serum creatinine,  $t0$  time after the induction of anaesthesia and before the start of surgery,  $t1$  time of intensive care unit admission,  $t2$  2 hours after intensive care unit admission, UCH13L1 urinary chitinase 3-like protein 1, UCr urinary creatinine, UO urine output

**Table S4D Biomarker performances at t3 for prediction of AKI**

| Endpoint            | AKI stage $\geq 2^a$ within 12 h after t1 |                        |                        | AKI stage $\geq 1^a$ within 48 h after t1 |                        |                        |
|---------------------|-------------------------------------------|------------------------|------------------------|-------------------------------------------|------------------------|------------------------|
|                     | AUC-ROC                                   | Lower limit of 95 % CI | Upper limit of 95 % CI | AUC-ROC                                   | Lower limit of 95 % CI | Upper limit of 95 % CI |
| $\Delta$ SCr        | 0.938                                     | 0.860                  | 1.000                  | 0.643                                     | 0.562                  | 0.724                  |
| [SCHI3L1]•[UNGAL]   | 0.774                                     | 0.710                  | 0.830                  | 0.665                                     | 0.594                  | 0.731                  |
| [SCHI3L1]•[UCHI3L1] | 0.758                                     | 0.692                  | 0.816                  | 0.684                                     | 0.613                  | 0.749                  |
| [UCHI3L1]•[UNGAL]   | 0.678                                     | 0.610                  | 0.741                  | 0.633                                     | 0.563                  | 0.700                  |
| [SCr]•[SCHI3L1]     | 0.814                                     | 0.754                  | 0.866                  | 0.723                                     | 0.654                  | 0.785                  |
| [SCr]•[UNGAL]       | 0.728                                     | 0.660                  | 0.788                  | 0.673                                     | 0.602                  | 0.738                  |
| [SCr]•[UCHI3L1]     | 0.754                                     | 0.688                  | 0.812                  | 0.725                                     | 0.656                  | 0.786                  |
| SCHI3L1             | 0.720                                     | 0.653                  | 0.781                  | 0.664                                     | 0.593                  | 0.730                  |
| UNGAL/UCr           | 0.649                                     | 0.579                  | 0.713                  | 0.600                                     | 0.529                  | 0.669                  |
| UNGAL               | 0.656                                     | 0.587                  | 0.720                  | 0.612                                     | 0.541                  | 0.679                  |
| UCHI3L1/UCr         | 0.653                                     | 0.584                  | 0.718                  | 0.617                                     | 0.546                  | 0.685                  |
| UCHI3L1             | 0.678                                     | 0.610                  | 0.741                  | 0.649                                     | 0.578                  | 0.715                  |
| SCr                 | 0.857                                     | 0.801                  | 0.902                  | 0.792                                     | 0.728                  | 0.847                  |

<sup>a</sup>KDIGO definitions for the diagnosis and staging of AKI, which are based on SCr and UO

AKI acute kidney injury, AUC-ROC area under the receiver-operating characteristics curve, CI confidence interval,  $\Delta$ SCr represents  $\Delta$ SCr<sub>t3-t0</sub>, which is the absolute change in SCr between SCr<sub>t3</sub> and SCr<sub>t0</sub>, *h* hour, KDIGO Kidney Disease | Improving Global Outcomes, SCHI3L1 serum chitinase 3-like protein 1, SCr serum creatinine, *t0* time after the induction of anaesthesia and before the start of surgery, *t1* time of intensive care unit admission, *t3* 4 hours after intensive care unit admission, UCHI3L1 urinary chitinase 3-like protein 1, UCr urinary creatinine, UNGAL urinary neutrophil gelatinase-associated lipocalin, UO urine output

## LEGENDS OF SUPPLEMENTAL FIGURES

### **Additional file 1: Fig. S1 STROBE statement – checklist of items that should be included in the reports of cohort studies (1)**

*No.* number, *STROBE* STrengthening the Reporting of OBservational studies in Epidemiology

### **Additional file 2: Fig. S2 KDIGO definition and classification of AKI (2)**

<sup>a</sup>For staging purposes, patients should be staged according to the criterion or criteria that give(s) them the highest stage.

*AKI* acute kidney injury, *d* day, *h* hour, *KDIGO* Kidney Disease | Improving Global Outcomes, *RRT* renal replacement therapy, *SCr* serum creatinine, *UO* urine output

### **Additional file 3: Fig. S3A Study course and sample collection times in a fictional morning patient**

*d* day, *h* hour, *MAKE* major adverse kidney event, *mo* month, *post-op* post-operatively, *SCr* serum creatinine, *t* time, *y* year

### **Additional file 4: Fig. S3B Study course and sample collection times in a fictional afternoon patient**

*d* day, *h* hour, *MAKE* major adverse kidney event, *mo* month, *post-op* post-operatively, *SCr* serum creatinine, *t* time, *y* year

### **Additional file 6: Fig. S4 Dissociation of the KDIGO definitions for the diagnosis and staging of AKI by SCr and UO**

*AKI* acute kidney injury, *h* hour, *KDIGO* Kidney Disease | Improving Global Outcomes, *SCr* serum creatinine, *UO* urine output

**Additional file 7: Fig. S5 Flow of patients over different diagnostic windows for AKI stage  $\geq 2$**

<sup>a</sup>Planned  $\geq 4$  h in advance

<sup>b</sup>KDIGO definitions for the diagnosis and staging of AKI, which are based on SCr and UO (2)

<sup>c</sup>KDOQI definitions for the diagnosis and staging of CKD (3)

<sup>d</sup> $\leq 3$  mo before

*AKI* acute kidney injury, *CKD* chronic kidney disease, *d* day, *h* hour, *ICU* intensive care unit, *KDIGO* Kidney Disease | Improving Global Outcomes, *KDOQI* Kidney Disease Outcomes Quality Initiative, *mo* month, *No.* number, *Sat* Saturday, *SCr* serum creatinine, *Sun* Sunday, *UO* urine output, *y* year

**Additional file 8: Fig. S6 Renal functional reserve of the glomerular function and functioning nephron mass**

Suppose that when all nephrons are functioning baseline GFR is 120 ml/min and that when stressed this GFR can reach 160 ml/min, indicating a RFR-G of 40 ml/min. With 87.5 % functioning nephrons, patient 1 will maintain a baseline GFR of 120 ml/min and reach a lower stress GFR of 150 ml/min. Patient 2 with 62.5 % functioning nephrons will maintain a lower, but still normal, baseline GFR of 105 ml/min and reach a lower stress GFR of 125 ml/min. An exposure that leads to 25 % loss of functioning nephron mass will lead to an increased SCr concentration in patient 2, but will remain undetected in patient 1. Note: the population variability of the RFR-G response is not known; represented values are only illustrative.

## ADDITIONAL FILE 5

*GFR* glomerular filtration rate, *RFR-G* renal functional reserve of the glomerular function, *SCr* serum creatinine

**REFERENCES**

1. Vandenbroucke JP, von Elm E, Altman DG, Gotzsche PC, Mulrow CD, Pocock SJ, et al. Strengthening the reporting of observational studies in epidemiology (STROBE): explanation and elaboration. *Plos Med.* 2007;4:1628-54.
2. Kidney Disease: Improving Global Outcomes (KDIGO) acute kidney injury work group. KDIGO clinical practice guideline for acute kidney injury. *Kidney International Suppl.* 2012;2:1-138.
3. Eknoyan G, Levin NW. KDOQI clinical practice guidelines for chronic kidney disease: evaluation, classification, and stratification - foreword. *Am J Kidney Dis.* 2002;39:S14-S266.
