# Supplementary material for: Diagnosis of cardiac surgery-associated acute kidney injury: differential roles of creatinine, chitinase 3-like protein 1 and neutrophil gelatinase-associated lipocalin: a prospective cohort study
Source: Ann Intensive Care. 2017 Mar 1;7:24. doi: 10.1186/s13613-017-0251-z (PMC5332341; doi:10.1186/s13613-017-0251-z)

No. of adults ( $\geq 18$  y) admitted to  
the post-operative cardiac surgery ICU  
from May 2012 till February 2014  
N = 1064

**Inclusion criteria**

- Elective surgery<sup>a</sup>
- Written informed consent

**Exclusion criteria**

- AKI stage  $\geq 1^b$  at time of enrolment
- CKD stage 5<sup>c</sup>
- Recent kidney transplant<sup>d</sup>
- Surgery on Sat or Sun

Enrolled  
N = 211

AKI stage  $\geq 2$   
at enrolment or  
at ICU admission  
N = 1

Excluded

Analysed  
N = 210

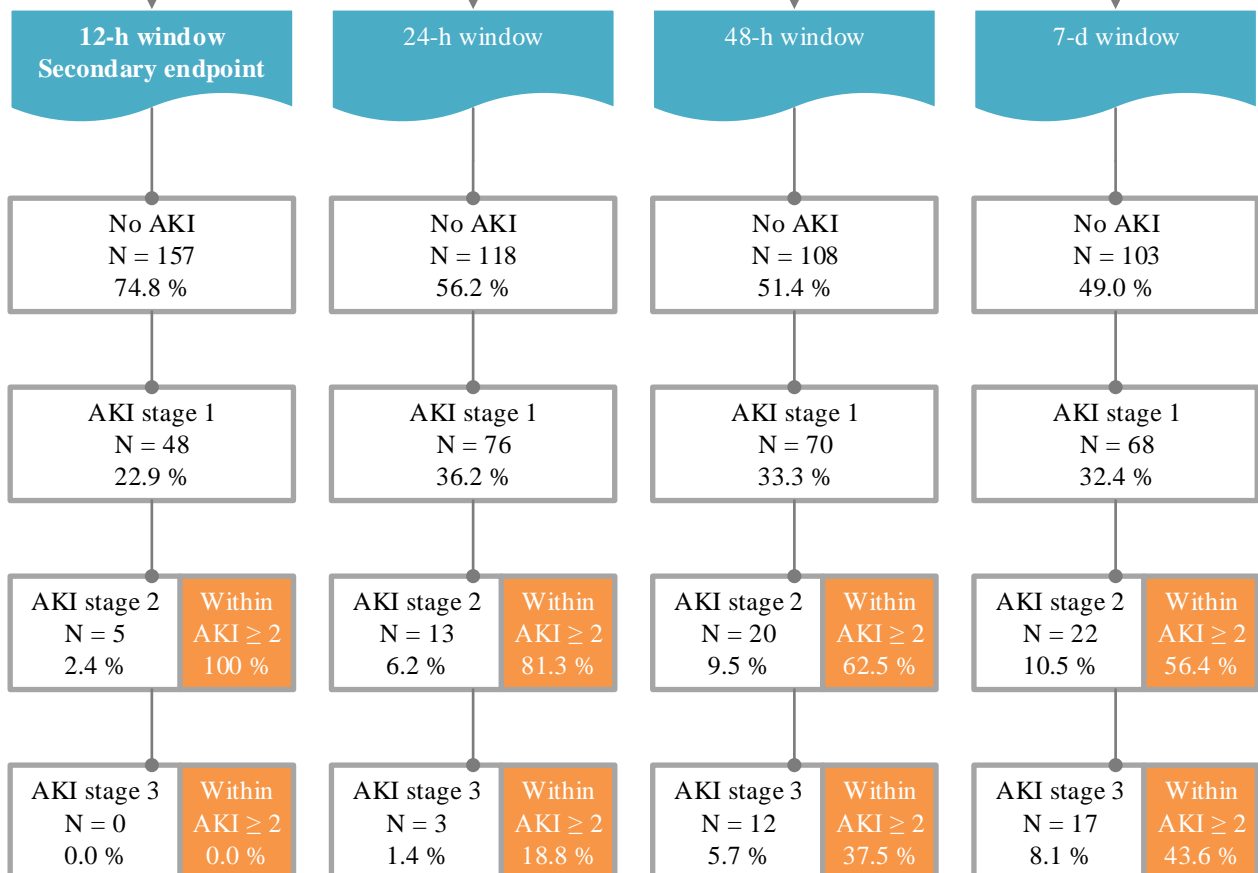

Supplement: Supplementary file 7 — Additional file 7: Figure S5. Flow of patients over different diagnostic windows for AKI stage ≥2. [file 13613_2017_251_MOESM7_ESM.pdf]
